# Supplementary material
Source: publisher figshare collection journal article supplement (https://acs.figshare.com/ndownloader/files/4559749)
Supplement: Supplementary file 1 [file 4559749]

**Supporting Information – XPS spectra**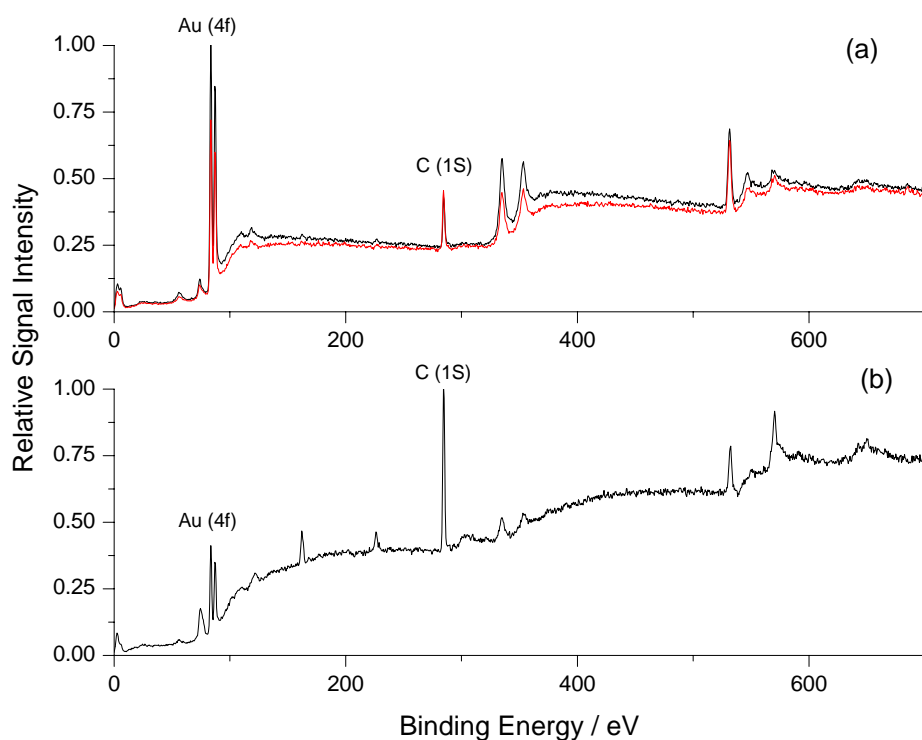

XPS spectra of C<sub>6</sub>H<sub>13</sub>-SAMs, as prepared freshly out of solution ((a) red line); in the vacuum chamber at the base pressure for 2.5 hours ((a) black line); and exposed to NO<sub>2</sub> in reaction chamber for ~ 1 hr ((b) black line).

The spectra show that the SAM composition is effectively unchanged, relative to a freshly prepared sample, through being in vacuum with no NO<sub>2</sub> present. Exposure to NO<sub>2</sub> results in obvious alterations to the composition, with the C (1s) peak now dominating over the Au (4f) peak.
